# Supplementary material
Source: publisher figshare collection journal article supplement (https://frontiersin.figshare.com/ndownloader/files/24012569)
Supplement: Supplementary file 1 [file 24012569]

**SUPPLE****MENTARY INFORMATION**

Table S1. List of species recorded in southeastern Amazon Basin in Mato Grosso state, Brazil. Presence and absence of seedlings (SD), resprouts (RP), seed rain (SR), and seed bank (SB) samples. (-) absent species by samples. Life form classification (LF).

| **Family/Species** | **SD** | **RP** | **S R** | **S B** | **L F** |
| --- | --- | --- | --- | --- | --- |
| **Anacardiaceae** |  |  |  |  |  |
| *Tapirira guianensis* Aubl. | x | x | x | - | tree |
| **Annonaceae** |  |  |  |  |  |
| *Guatteria schomburgkiana* Mart. | - | - | x | - | tree |
| *Bocageopsis mattogrossensis* (R.E. Fr.) R.E. Fr. | - | - | - | x | tree |
| *Guatteria blepharophylla* Mart. | x | - | - | - | tree |
| *Xylopia amazonica* R.E. Fr. | x | - | - | x | tree |
| *Xylopia cayennensis* Maas | - | - | x | - | tree |
| Xylopia frutescens Aubl. | - | - | x | - | tree |
| **Asteraceae** |  |  |  |  |  |
| *Lepidaploa gracilis* (Kunth) H. Rob. | - | - | - | x | shrub |
| **Apocynaceae** |  |  |  |  |  |
| *Aspidosperma excelsum* Benth. | - | - | x | - | tree |
| *Aspidosperma obscurinervium* Azambuja | x | - | x | - | tree |
| *Forsteronia affinis* Müll. Arg. | x | x | - | - | liana |
| *Himatanthus sucuuba* (Spruce ex Müll. Arg.) Woodson | x | - | - | - | tree |
| *Secondatia densiflora* A. DC. | x | - | - | - | liana |
| **Araliaceae** |  |  |  |  |  |
| *Schefflera morototoni* (Aubl.) Maguire, Steyerm. & Frodin | x | - | x | x | tree |
| **Bignoniaceae** |  |  |  |  |  |
| *Adenocalymma longilineum* (A. Samp.) L.G. Lohmann | - | x | - | - | liana |
| *Arrabideae* sp | - | x | - | - | liana |
| *Cuspidaria inaequalis* (DC. ex Splitg.) L.G. Lohmann | x | x | - | - | liana |
| *Fridericia cinnamomea* (DC.) L.G. Lohmann | x | x | - | - | liana |
| Indet. sp 1 | - | x | - | - | liana |
| *Jacaranda copaia* (Aubl.) D. Don | x | - | - | x | tree |
| *Pleonotoma melioides* (S. Moore) A.H. Gentry | x | - | - | - | liana |
| *Pyrostegia venusta* (Ker Gawl.) Miers | x | x | - | - | liana |
| **Boraginaceae** |  |  |  |  |  |
| *Cordia bicolor* A. DC. | x | x | x | - | tree |
| **Burseraceae** |  |  |  |  |  |
| *Dacryodes microcarpa* Cuatrec. | x | - | x | - | tree |
| *Protium guianense* (Aubl.) Marchand | x | x | x | - | tree |
| *Protium unifoliolatum* Engl. | x | - | - | - | tree |
| *Trattinnickia burseraefolia* Mart. | x | - | - | x | tree |
| *Trattinnickia glaziovii* Swart | x | - | x | x | tree |
| **Celastraceae** |  |  |  |  |  |
| *Elachyptera floribunda* (Benth.) A.C. Sm. | x | x | x | - | liana |
| *Hippocratea volubilis* L. | x | x | - | - | liana |
| **Chrysobalanaceae** |  |  |  |  |  |
| *Licania egleri* Prance | x | - | x | - | tree |
| *Hirtella glandulosa* Spreng. | x | - | x | x | tree |
| *Licania gracilipes* Taub. | - | x | x | - | tree |
| **Combretaceae** |  |  |  |  |  |
| *Buchenavia tetraphylla* (Aubl.) R.A. Howard | - | - | x | - | tree |
| **Connaraceae** |  |  |  |  |  |
| *Connarus perrottetii* (DC.) Planch. | x | - | x | - | tree |
| **Dilleniaceae** |  |  |  |  |  |
| *Davilla kunthii* A. St.-Hil. | x | - | x | x | liana |
| *Doliocarpus spatulifolius* Kubitzki | x | x | x | x | liana |
| **Ebenaceae** |  |  |  |  |  |
| *Diospyros sericea* A. DC. | - | - | x | - | tree |
| **Elaeocarpaceae** |  |  |  |  |  |
| *Sloanea eichleri* K. Schum. | x | - | x | - | tree |
| **Erythroxylaceae** |  |  |  |  |  |
| *Erythroxylum rufum* Cav. | x | - | x | - | tree |
| **Euphorbiaceae** |  |  |  |  |  |
| *Chaetocarpus echinocarpus* (Baill.) Ducke | x | x | - | x | tree |
| *Mabea fistulifera*Mart. | x | x | x | - | tree |
| *Maprounea guianensis* Aubl. | x | - | - | x | tree |
| *Pera coccinea* (Benth.) Müll. Arg. | - | - | x | - | tree |
| **Fabaceae** |  |  |  |  |  |
| *Abrus precatorius* L. | x | - | - | - | liana |
| *Copaifera reticulata* Ducke | - | - | x | - | tree |
| *Derris floribunda*(Benth.) Ducke | x | x | x | - | liana |
| *Enterolobium schomburgkii* (Benth.) Benth. | - | - | x | - | tree |
| *Inga alba* (Sw.) Willd | - | - | x | - | tree |
| *Inga heterophylla* Willd. | x | x | - | - | tree |
| *Machaerium myrianthum* Spruce ex Benth. | x | - | - | - | liana |
| *Ormosia paraensis* Ducke | x | - | x | - | tree |
| *Parkia pendula* (Willd.) Benth. ex Walp. | - | - | x | - | tree |
| *Tachigali vulgaris* L.F. Gomes da Silva & H.C. Lima | x | x | x | x | tree |
| **Humiriaceae** |  |  |  |  |  |
| *Humiria balsamifera*(Aubl.) J.St.-Hil. | - | - | x | - | tree |
| *Sacoglottis guianensis* Benth. | x | - | x | x | tree |
| **Hypericaceae** |  |  |  |  |  |
| *Vismia latifolia* (Aubl.) Choisy | x | x | - | x | tree |
| **Lauraceae** |  |  |  |  |  |
| *Nectandra cuspidata* Nees & Mart. | x | x | x | - | tree |
| *Ocotea cujumary* Mart. | - | - | x | - | tree |
| *Ocotea guianensis* Aubl. | x | x | x | - | tree |
| *Ocotea leucoxylon* (Sw.) Laness. | x | - | x | x | tree |
| *Ocotea* sp1 | - | - | x | - | tree |
| **Loganiaceae** |  |  |  |  |  |
| *Strychnos xinguensis* Krukoff | x | - | x | - | liana |
| **Malpighiaceae** |  |  |  |  |  |
| *Byrsonima aerugo* Sagot | - | - | x | - | tree |
| *Tetrapterys styloptera* A. Juss. | x | x | x | - | liana |
| *Banisteriopsis malifolia* (Nees & Mart.) B. Gates | x | x | - | - | liana |
| **Malvaceae** |  |  |  |  |  |
| *Mollia lepidota* Spruce ex Benth. | - | - | x | x | tree |
| **Melastomataceae** |  |  |  |  |  |
| *Bellucia grossularioides* (L.) Triana | - | - | x | x | tree |
| *Miconia dichrophylla* J.F. Macbr. | - | - | x | - | tree |
| *Miconia dispar* Benth. | - | - | - | x | tree |
| *Miconia gratissima* Benth. ex Triana | x | - | x | x | tree |
| *Miconia minutiflora* (Bonpl.) DC. | - | - | - | x | tree |
| *Miconia serrulata* (DC.) Naudin | - | - | - | x | tree |
| *Miconia* sp 1 | - | - | - | x | tree |
| *Miconia* sp 2 | - | - | - | x | tree |
| *Miconia* sp 3 | - | - | x | - | tree |
| *Mouriri brachyanthera* Ducke | - | - | x | - | tree |
| **Meliaceae** |  |  |  |  |  |
| *Trichilia quadrijuga* Kunth | x | - | x | - | tree |
| **Moraceae** |  |  |  |  |  |
| *Ficus americana* subsp. *guianensis* (Desv. ex Ham.) C.C. Berg | - | - | - | x | liana |
| *Pseudolmedia macrophylla* Trécul | x | - | - | - | tree |
| **Myristicaceae** |  |  |  |  |  |
| *Virola sebifera* Aubl. | x | x | x | - | tree |
| **Myrtaceae** |  |  |  |  |  |
| *Marlierea umbraticola* (Kunth) O. Berg | - | x | x | - | tree |
| Myrcia multiflora (Lam.) DC. | x | x | - | - | tree |
| *Myrcia sylvatica* (G. Mey.) DC. | x | x | - | - | tree |
| **Ochnaceae** |  |  |  |  |  |
| *Ouratea discophora* Ducke | - | - | x | - | tree |
| **Polygalaceae** |  |  |  |  |  |
| *Securidaca bialata* Benth. | x | - | - | - | liana |
| **Rubiaceae** |  |  |  |  |  |
| *Amaioua guianensis* Aubl. | x | x | x | x | tree |
| *Psychotria prunifolia* (Kunth) Steyerm. | x | - | - | x | shrub |
| *Psychotria sphaerocephala* Müll. Arg. | x | - | - | x | shrub |
| *Palicourea corymbifera* (Müll. Arg.) Standl. | x | - | - | x | shrub |
| **Salicaceae** |  |  |  |  |  |
| *Casearia grandiflora* Cambess. | x | - | - | x | tree |
| **Sapindaceae** |  |  |  |  |  |
| *Matayba guianensis* Aubl. | - | x | x | - | tree |
| *Matayba spruceana* (Hook.) Radlk. | - | - | x | - | tree |
| *Paullinia pachycarpa* Benth. | - | - | x | - | liana |
| *Paullinia* sp 1 | - | x | - | - | liana |
| *Serjania membranacea* Splitg. | x | - | - | - | liana |
| **Sapotaceae** |  |  |  |  |  |
| *Micropholis egensis* (A. DC.) Pierre | x | - | x | - | tree |
| *Pouteria ramiflora* (Mart.) Radlk. | x | - | x | - | tree |
| **Simaroubaceae** |  |  |  |  |  |
| *Simarouba amara* Aubl. | x | x | x | - | tree |
| **Siparunaceae** |  |  |  |  |  |
| *Siparuna guianensis* Aubl. | - | x | - | - | tree |
| **Solanaceae** |  |  |  |  |  |
| *Solanum mauritianum* Scop. | x | x | x | x | tree |
| *Solanum* sp 1 | - | - | - | x | shrub |
| *Solanum* sp 2 | - | - | - | x | shrub |
| *Solanum lycocarpum* A. St.-Hil. | - |  |  | x | shrub |
| **Urticaceae** |  |  |  |  |  |
| *Cecropia distachya* Huber | - | - | - | x | tree |
| *Cecropia glaziovii* Snethl. | x | - | - | x | tree |
| **Vochysiaceae** |  |  |  |  |  |
| *Vochysia vismiifolia* Spruce ex Warm. | - | - | x | - | tree |
| **Não Identificadas** |  |  |  |  |  |
| Indet. sp 2 | - | - | x | - |  |
| Indet. sp 3 | - | - | x | - |  |
| Indet. sp 4 | - | - | x | - |  |
| Indet. sp 5 | - | - | x | - |  |
| Indet. sp 6 | - | - | x | - |  |
| Indet. sp 7 | x | x | - | - | shrub |
| Indet. sp 8 | - | - | x | - | tree |

Table S2. Abundance of seedlings (SD), resprouts (RP), seed rain (SR), and seed bank (SB) species recorded in the unburned Control plot, comprising all the study period, in southeastern Amazon Basin in Mato Grosso state, Brazil.

| **Family/Species** | **SD** | **RP** | **SR** | **SB** |
| --- | --- | --- | --- | --- |
| **Anacardiaceae** |  |  |  |  |
| *Tapirira guianensis* Aubl. | 4 | 0 | 2246 | 0 |
| **Annonaceae** |  |  |  |  |
| *Guatteria schomburgkiana* Mart. | 0 | 0 | 10 | 0 |
| *Bocageopsis mattogrossensis* (R.E. Fr.) R.E. Fr. | 0 | 0 | 0 | 1 |
| *Guatteria blepharophylla* Mart. | 2 | 0 | 0 | 0 |
| *Xylopia amazonica* R.E. Fr. | 6 | 0 | 0 | 1 |
| *Xylopia cayennensis* Maas | 0 | 0 | 4 | 0 |
| Xylopia frutescens Aubl. | 0 | 0 | 4360 | 0 |
| **Apocynaceae** |  |  |  |  |
| *Aspidosperma excelsum* Benth. | 0 | 0 | 21 | 0 |
| *Aspidosperma obscurinervium* Azambuja | 1 | 0 | 0 | 0 |
| *Forsteronia affinis* Müll. Arg. | 2 | 0 | 0 | 0 |
| *Himatanthus sucuuba* (Spruce ex Müll. Arg.) Woodson | 1 | 0 | 0 | 0 |
| *Secondatia densiflora* A. DC. | 1 | 0 | 0 | 0 |
| **Araliaceae** |  |  |  |  |
| *Schefflera morototoni* (Aubl.) Maguire, Steyerm. & Frodin | 2 | 0 | 1790 | 2 |
| **Bignoniaceae** |  |  |  |  |
| *Cuspidaria inaequalis* (DC. ex Splitg.) L.G. Lohmann | 2 | 1 | 0 | 0 |
| *Fridericia cinnamomea* (DC.) L.G. Lohmann | 10 | 1 | 0 | 0 |
| *Jacaranda copaia* (Aubl.) D. Don | 2 | 0 | 0 | 4 |
| *Pleonotoma melioides* (S. Moore) A.H. Gentry | 1 | 0 | 0 | 0 |
| *Pyrostegia venusta* (Ker Gawl.) Miers | 3 | 4 | 0 | 0 |
| **Boraginaceae** |  |  |  |  |
| *Cordia bicolor* A. DC. | 2 | 0 | 418 | 0 |
| **Burseraceae** |  |  |  |  |
| *Dacryodes microcarpa* Cuatrec. | 0 | 0 | 15 | 0 |
| *Protium guianense* (Aubl.) Marchand | 35 | 0 | 413 | 0 |
| *Protium unifoliolatum* Engl. | 4 | 0 | 0 | 0 |
| *Trattinnickia burseraefolia* Mart. | 1 | 0 | 0 | 7 |
| *Trattinnickia glaziovii* Swart | 4 | 0 | 401 | 8 |
| **Celastraceae** |  |  |  |  |
| *Elachyptera floribunda* (Benth.) A.C. Sm. | 58 | 9 | 56 | 0 |
| *Hippocratea volubilis* L. | 1 | 1 | 0 | 0 |
| **Chrysobalanaceae** |  |  |  |  |
| *Licania egleri* Prance | 1 | 0 | x | 0 |
| *Hirtella glandulosa* Spreng. | 0 | 0 | x | 0 |
| *Licania gracilipes* Taub. | 0 | 0 | 26 | 0 |
| **Combretaceae** |  |  |  |  |
| *Buchenavia tetraphylla* (Aubl.) R.A. Howard | 0 | 0 | 7 | 0 |
| **Connaraceae** |  |  |  |  |
| *Connarus perrottetii* (DC.) Planch. | 3 | 0 | 3 | 0 |
| **Dilleniaceae** |  |  |  |  |
| *Davilla kunthii* A. St.-Hil. | 3 | 0 | 89 | 3 |
| *Doliocarpus spatulifolius* Kubitzki | 7 | 2 | 496 | 1 |
| **Elaeocarpaceae** |  |  |  |  |
| *Sloanea eichleri* K. Schum. | 3 | 0 | 352 | 0 |
| **Erythroxylaceae** |  |  |  |  |
| *Erythroxylum rufum* Cav. | 2 | 0 | 5 | 0 |
| **Euphorbiaceae** |  |  |  |  |
| *Chaetocarpus echinocarpus* (Baill.) Ducke | 7 | 0 | 306 | 3 |
| *Mabea fistulifera*Mart. | 15 | 1 | 547 | 0 |
| *Maprounea guianensis* Aubl. | 0 | 0 | 0 | 1 |
| *Pera coccinea* (Benth.) Müll. Arg. | 0 | 0 | 3 | 0 |
| **Fabaceae** |  |  |  |  |
| *Abrus precatorius* L. | 1 | 0 | 0 | 0 |
| *Copaifera reticulata* Ducke | 0 | 0 | 3 | 0 |
| *Derris floribunda*(Benth.) Ducke | 7 | 1 | 86 | 0 |
| *Enterolobium schomburgkii* (Benth.) Benth. | 0 | 0 | 16 | 0 |
| *Inga alba* (Sw.) Willd | 0 | 0 | 3 | 0 |
| *Inga heterophylla* Willd. | 3 | 0 | 0 | 0 |
| *Machaerium myrianthum* Spruce ex Benth. | 4 | 0 | 0 | 0 |
| *Ormosia paraensis* Ducke | 2 | 0 | 0 | 0 |
| *Parkia pendula* (Willd.) Benth. ex Walp. | 0 | 0 | 0 | 0 |
| *Tachigali vulgaris* L.F. Gomes da Silva & H.C. Lima | 1 | 0 | 168 | 8 |
| **Humiriaceae** |  |  |  |  |
| *Sacoglottis guianensis* Benth. | 2 | 0 | 119 | 6 |
| **Hypericaceae** |  |  |  |  |
| *Vismia latifolia* (Aubl.) Choisy | 0 | 6 | 0 | 3 |
| **Lauraceae** |  |  |  |  |
| *Nectandra cuspidata* Nees & Mart. | 10 | 1 | 45 | 0 |
| *Ocotea cujumary* Mart. | 0 | 0 | 3 | 0 |
| *Ocotea guianensis* Aubl. | 5 | 22 | 39 | 0 |
| *Ocotea leucoxylon* (Sw.) Laness. | 7 | 0 | 504 | 0 |
| *Ocotea* sp1 | 0 | 0 | 26 | 0 |
| **Loganiaceae** |  |  |  |  |
| *Strychnos xinguensis* Krukoff | 1 | 0 | 138 | 0 |
| **Malpighiaceae** |  |  |  |  |
| *Byrsonima aerugo* Sagot | 0 | 0 | 77 | 0 |
| *Tetrapterys styloptera* A. Juss. | 27 | 0 | 2 | 0 |
| *Banisteriopsis malifolia* (Nees & Mart.) B. Gates | 0 | 3 | 0 | 0 |
| **Malvaceae** |  |  |  |  |
| *Mollia lepidota* Spruce ex Benth. | 0 | 0 | 5 | 3 |
| **Melastomataceae** |  |  |  |  |
| *Bellucia grossularioides* (L.) Triana | 0 | 0 | 75 | 54 |
| *Miconia dichrophylla* J.F. Macbr. | 0 | 0 | 476 | 0 |
| *Miconia dispar* Benth. | 0 | 0 | 0 | 38 |
| *Miconia gratissima* Benth. ex Triana | 1 | 0 | 271 | 0 |
| *Miconia minutiflora* (Bonpl.) DC. | 0 | 0 | 0 | 75 |
| *Miconia serrulata* (DC.) Naudin | 0 | 0 | 0 | 521 |
| *Miconia* sp 1 | 0 | 0 | 0 | 81 |
| *Miconia* sp 2 | 0 | 0 | 0 | 8 |
| *Miconia* sp 3 | 0 | 0 | 21 | 401 |
| *Mouriri brachyanthera* Ducke | 0 | 0 | 23 | 0 |
| **Meliaceae** |  |  |  |  |
| *Trichilia quadrijuga* Kunth | 3 | 0 | 206 | 0 |
| **Moraceae** |  |  |  |  |
| *Ficus americana* subsp. *guianensis* (Desv. ex Ham.) C.C. Berg | 0 | 0 | 0 | 8 |
| *Pseudolmedia macrophylla* Trécul | 1 | 0 | 0 | 1 |
| **Myristicaceae** |  |  |  |  |
| *Virola sebifera* Aubl. | 3 | 0 | 14 | 0 |
| **Myrtaceae** |  |  |  |  |
| *Marlierea umbraticola* (Kunth) O. Berg | 0 | 1 | 1 | 0 |
| Myrcia multiflora (Lam.) DC. | 13 | 4 | 0 | 0 |
| *Myrcia sylvatica* (G. Mey.) DC. | 3 | 0 | 0 | 0 |
| **Ochnaceae** |  |  |  |  |
| *Ouratea discophora* Ducke | 0 | 0 | 91 | 0 |
| **Polygalaceae** |  |  |  |  |
| *Securidaca bialata* Benth. | 2 | 0 | 0 | 0 |
| **Rubiaceae** |  |  |  |  |
| *Amaioua guianensis* Aubl. | 2 | 1 | 136 | 13 |
| *Psychotria prunifolia* (Kunth) Steyerm. | 6 | 0 | 0 | 0 |
| *Psychotria sphaerocephala* Müll. Arg. | 4 | 0 | 0 | 0 |
| *Palicourea corymbifera* (Müll. Arg.) Standl. | 1 | 0 | 0 | 0 |
| **Salicaceae** |  |  |  |  |
| *Casearia grandiflora* Cambess. | 1 | 0 | 0 | 42 |
| **Sapindaceae** |  |  |  |  |
| *Matayba guianensis* Aubl. | 0 | 0 | 1 | 0 |
| *Matayba spruceana* (Hook.) Radlk. | 0 | 0 | 6 | 0 |
| *Paullinia pachycarpa* Benth. | 0 | 0 | 9 | 0 |
| *Paullinia* sp 1 | 0 | 1 | 0 | 0 |
| *Serjania membranacea* Splitg. | 4 | 0 | 0 | 0 |
| **Sapotaceae** |  |  |  |  |
| *Micropholis egensis* (A. DC.) Pierre | 1 | 0 | 451 | 0 |
| *Pouteria ramiflora* (Mart.) Radlk. | 93 | 0 | 770 | 0 |
| **Simaroubaceae** |  |  |  |  |
| *Simarouba amara* Aubl. | 0 | 0 | 2 | 0 |
| **Solanaceae** |  |  |  |  |
| *Solanum mauritianum* Scop. | 0 | 0 | 1 | 0 |
| *Solanum* sp 1 | 0 | 0 | 0 | 1 |
| *Solanum* sp 2 | 0 | 0 | 0 | 1 |
| *Solanum lycocarpum* A. St.-Hil. | 0 | 0 | 0 | 2 |
| **Urticaceae** |  |  |  |  |
| *Cecropia distachya* Huber | 0 | 0 | 0 | 53 |
| *Cecropia glaziovii* Snethl. | 0 | 0 | 0 | 2 |
| **Vochysiaceae** |  |  |  |  |
| *Vochysia vismiifolia* Spruce ex Warm. | 0 | 0 | 10 | 0 |
| **Não Identificadas** |  |  |  |  |
| Indet. sp 2 | 0 | 0 | 36 | 0 |
| Indet. sp 3 | 0 | 0 | 10 | 0 |
| Indet. sp 4 | 0 | 0 | 404 | 0 |
| Indet. sp 5 | 0 | 0 | 6 | 0 |
| Indet. sp 6 | 0 | 0 | 49 | 0 |
| Indet. sp 8 | 0 | 0 | 40 | 0 |
| **Total abundance** | **391** | **59** | **15911** | **1352** |

Table S3. Shannon index (H’), Simpson’s diversity index (D) and Pielou’s evenness (J) of seedlings, resprouts, seed rain and seed bank. B0 (control) was not burned, B3 was burned three times with three years interval, and B6 was burned annually, six times.

|  | | Seedling | Resprout | Seed Rain | Seed Bank |
| --- | --- | --- | --- | --- | --- |
| *B0* | *H'* | 3.02 | 2.14 | 2.74 | 1.87 |
| *D* | 0.90 | 0.81 | 0.88 | 0.75 |
| *J* | 0.75 | 0.77 | 0.66 | 0.55 |
| *B3* | *H'* | 2.84 | 2.53 | 1.81 | 1.48 |
| *D* | 0.91 | 0.88 | 0.70 | 0.63 |
| *J* | 0.90 | 0.79 | 0.46 | 0.52 |
| *B6* | *H'* | 1.53 | 2.17 | 2.50 | 1.01 |
| *D* | 0.61 | 0.86 | 0.88 | 0.42 |
| *J* | 0.53 | 0.90 | 0.63 | 0.35 |

Table S4. Results of Generalized Linear Models analysis of seed bank and seed rain by distances of edge. B0 (control) was not burned, B3 was burned three times with three years interval, and B6 was burned annually, six times. * significative results.

| Richness | Edge distances (m) | Burned triennially (B3) | | | |  | Burned annually (B6) | | | |
| --- | --- | --- | --- | --- | --- | --- | --- | --- | --- | --- |
| Estimate | Std Error | t value | Pr(>t) |  | Estimate | Std Error | t value | Pr(>t) |
| Seed bank | 0 | 0.22 | 0.78 | 0.28 | 0.77 |  | 1.09 | 1.55 | 0.70 | 0.48 |
| 30 | 0.78 | 0.95 | 0.83 | 0.41 |  | 1.90 | 1.66 | 1.14 | 0.26 |
| 100 | 0.47 | 1.00 | 0.46 | 0.64 |  | 1.49 | 1.72 | 0.86 | 0.39 |
| 500 | 2.51 | 0.81 | 3.07 | 0.004** |  | 0.96 | 1.82 | 0.52 | 0.60 |
| 750 | 2.62 | 0.81 | 3.21 | 0.002** |  | 2.56 | 1.61 | 1.59 | 0.12 |
| Seed Rain | 0 | 2.62e-01 | 3.72e-01 | 0.70 | 0.483 |  | 0.40 | 0.29 | 1.35 | 0.17 |
| 10 | 5.26e-01 | 4.69e-01 | 1.12 | 0.265 |  | -0.31 | 0.45 | -0.67 | 0.50 |
| 15 | 5.37e-09 | 5.26e-01 | 0.00 | 1.000 |  | -0.22 | 0.44 | -0.49 | 0.61 |
| 30 | 3.85e-09 | 5.26e-01 | 0.00 | 1.000 |  | 0.33 | 0.39 | 0.86 | 0.39 |
| 50 | -6.19e-01 | 6.29e-01 | -0.98 | 0.32 |  | 0.90 | 0.35 | 2.55 | 0.01* |
| 100 | 5.26e-01 | 4.69e-01 | 1.12 | 0.26 |  | 1.22 | 0.33 | 3.60 | 0.000*** |
| 250 | 1.01e-00 | 4.34e-01 | 2.34 | 0.02* |  | 1.45 | 0.33 | 4.37 | 3.6e-05*** |
| 500 | 1.12e-00 | 4.28e-01 | 2.62 | 0.01* |  | 1.35 | 0.33 | 4.03 | 0.000*** |
| 750 | 1.51e-00 | 4.11e-01 | 3.67 | 0.000*** |  | 1.24 | 0.33 | 3.66 | 0.000*** |
